# Supplementary material for: Toward a dodecanuclear molecular Re(i) box: structural and spectroscopic properties
Source: Royal Society of Chemistry journal article supplement (doi:10.1039/c9dt01115c), 2019-01-01
Supplement: c9dt01115c1.pdf [file c9dt01115c1.pdf]

## **Toward a Dodecanuclear Molecular Re(I) Box: Structural and Spectroscopic Properties**

Biing-Chiau Tzeng,<sup>\*,a</sup> Yu-Jen Hsiao,<sup>a</sup> and Gene-Hsiang Lee,<sup>b</sup> Hai-Ying Wang,<sup>c</sup> Chanel F. Leong,<sup>d</sup>  
Deanna M. D'Alessandro<sup>d</sup> and Jing-Lin Zuo<sup>\*,c</sup>

<sup>a</sup>Department of Chemistry and Biochemistry, National Chung Cheng University, 168 University Rd.,  
Min-Hsiung, Chiayi 62102, Taiwan

<sup>b</sup>Department of Chemistry, National Taiwan University, 1, Sec. 4, Roosevelt Road, Taipei 10617, Taiwan

<sup>c</sup>State Key Laboratory of Coordination Chemistry, School of Chemistry and Chemical Engineering,  
Nanjing University, Nanjing 210023, P. R. China

<sup>d</sup>School of Chemistry, The University of Sydney, Sydney, New South Wales, 2006, Australia

## Supporting Information

**Table S1** Crystallographic Data for **1** and **2**.

|                                                                        | [(Re(CO) <sub>3</sub> ) <sub>6</sub> (tpeb) <sub>2</sub> (N <sub>3</sub> S <sub>3</sub> ) <sub>2</sub> ]<br>4CH <sub>3</sub> CN·toluene<br><b>1</b> ·4CH <sub>3</sub> CN·toluene | [(Re(CO) <sub>3</sub> ) <sub>12</sub> (TTF(py) <sub>4</sub> ) <sub>3</sub> (N <sub>3</sub> S <sub>3</sub> ) <sub>4</sub> ]<br>8CH <sub>3</sub> CN·12DMF<br><b>2</b> ·8CH <sub>3</sub> CN·12DMF |
|------------------------------------------------------------------------|----------------------------------------------------------------------------------------------------------------------------------------------------------------------------------|------------------------------------------------------------------------------------------------------------------------------------------------------------------------------------------------|
| Empirical formula                                                      | C <sub>107</sub> H <sub>56</sub> N <sub>18</sub> O <sub>18</sub> Re <sub>6</sub> S <sub>6</sub>                                                                                  | C <sub>178</sub> H <sub>156</sub> N <sub>44</sub> O <sub>48</sub> Re <sub>12</sub> S <sub>24</sub>                                                                                             |
| Formula weight                                                         | 3191.25                                                                                                                                                                          | 6683.30                                                                                                                                                                                        |
| Crystal system                                                         | Monoclinic                                                                                                                                                                       | Triclinic                                                                                                                                                                                      |
| Space group                                                            | <i>C2/c</i>                                                                                                                                                                      | <i>P</i> $\bar{1}$                                                                                                                                                                             |
| a (Å)                                                                  | 35.076(1)                                                                                                                                                                        | 14.662(1)                                                                                                                                                                                      |
| b (Å)                                                                  | 18.413(1)                                                                                                                                                                        | 19.304(1)                                                                                                                                                                                      |
| c (Å)                                                                  | 24.677(2)                                                                                                                                                                        | 22.801(1)                                                                                                                                                                                      |
| $\alpha$ (°)                                                           |                                                                                                                                                                                  | 114.181(1)                                                                                                                                                                                     |
| $\beta$ (°)                                                            | 133.677(1)                                                                                                                                                                       | 101.722(1)                                                                                                                                                                                     |
| $\gamma$ (°)                                                           |                                                                                                                                                                                  | 93.201(1)                                                                                                                                                                                      |
| V (Å <sup>3</sup> ), Z                                                 | 11527.0(9), 4                                                                                                                                                                    | 5694.2(4), 1                                                                                                                                                                                   |
| F(000) (e)                                                             | 6056                                                                                                                                                                             | 3200                                                                                                                                                                                           |
| $\mu$ (Mo-K $\alpha$ ) (mm <sup>-1</sup> )                             | 6.454                                                                                                                                                                            | 6.648                                                                                                                                                                                          |
| T (K)                                                                  | 150(2)                                                                                                                                                                           | 150(2)                                                                                                                                                                                         |
| Reflections collected                                                  | 42647                                                                                                                                                                            | 52052                                                                                                                                                                                          |
| Independent reflections<br>(Fo $\geq$ 2 $\sigma$ (Fo))                 | 13199 (R <sub>int</sub> =0.034)                                                                                                                                                  | 26124 (R <sub>int</sub> =0.022)                                                                                                                                                                |
| Refined parameters                                                     | 717                                                                                                                                                                              | 1192                                                                                                                                                                                           |
| Goodness-of-fit on F <sup>2</sup>                                      | 1.054                                                                                                                                                                            | 1.083                                                                                                                                                                                          |
| R <sup>a</sup> , R <sub>w</sub> <sup>b</sup> (I $\geq$ 2 $\sigma$ (I)) | 0.030, 0.073                                                                                                                                                                     | 0.037, 0.091                                                                                                                                                                                   |
| R <sup>a</sup> , R <sub>w</sub> <sup>b</sup> (all data)                | 0.039, 0.078                                                                                                                                                                     | 0.048, 0.098                                                                                                                                                                                   |

$${}^a R = \frac{\sum ||F_o| - |F_c||}{\sum |F_o|}, \quad {}^b R_w = \left\{ \frac{\sum w(F_o^2 - F_c^2)^2}{\sum [w(F_o^2)^2]} \right\}^{1/2}.$$

Figure S1. The experimental and simulated powder X-ray diffraction patterns of **1**.

Figure S2. The experimental and simulated powder X-ray diffraction patterns of **2**.

Figure S3. The TGA trace of **1**.

Figure S4. The TGA trace of **2**.

Figure S5. The normalized emission spectra for solid samples of **1** at room temperature (black) and at 77 K (red). Excitation wavelengths are at 300 nm.

Figure S6. The normalized emission spectra for solid samples of **2** at room temperature (black) and at 77 K (red). Excitation wavelengths are at 300 nm.

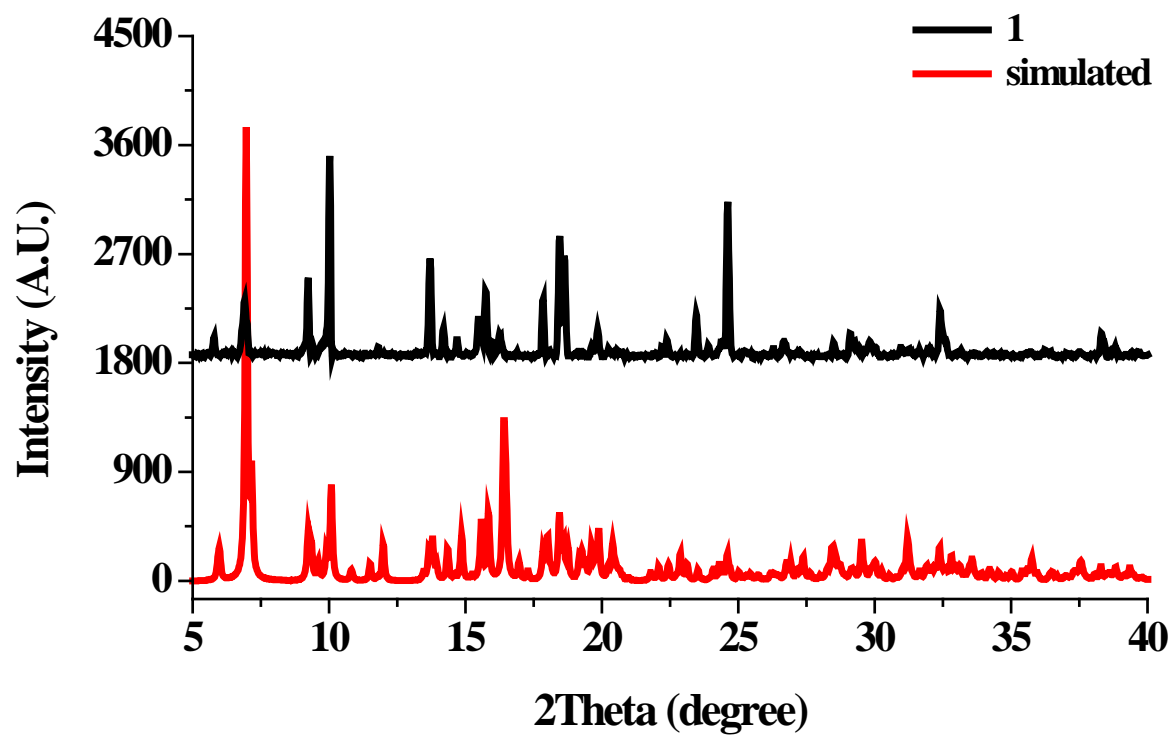

Figure S1

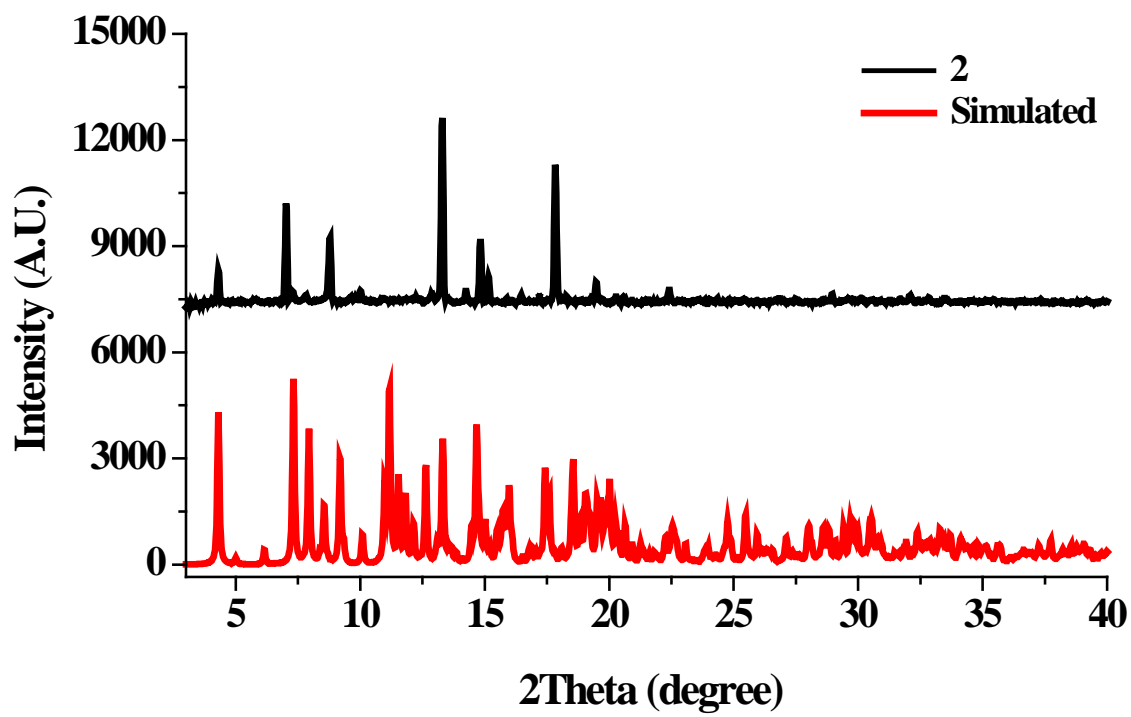

Figure S2

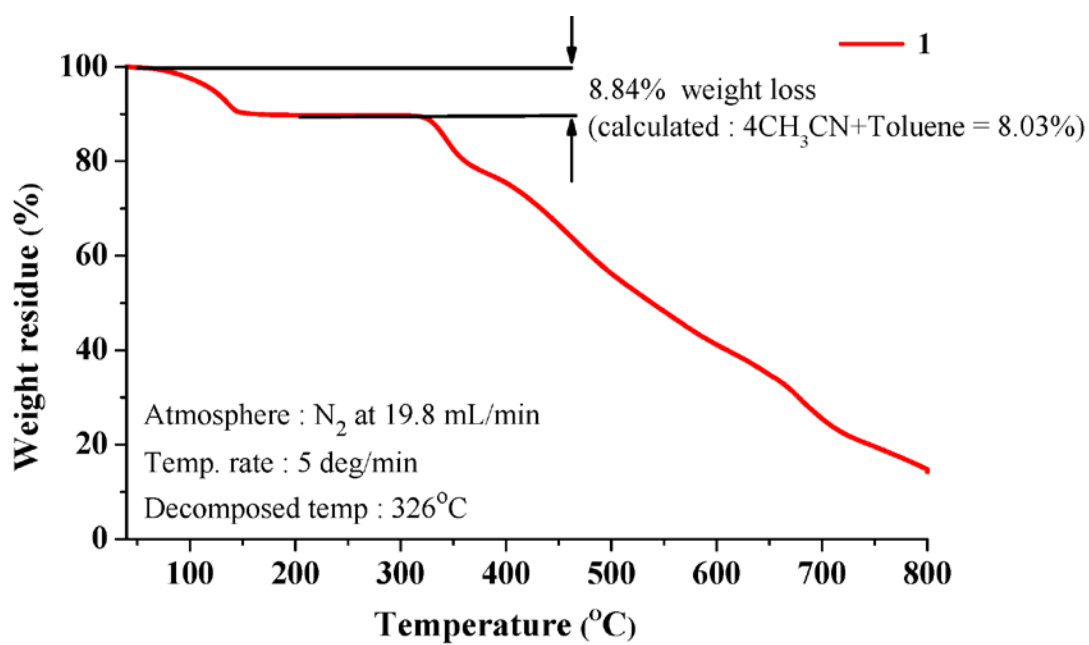

Figure S3

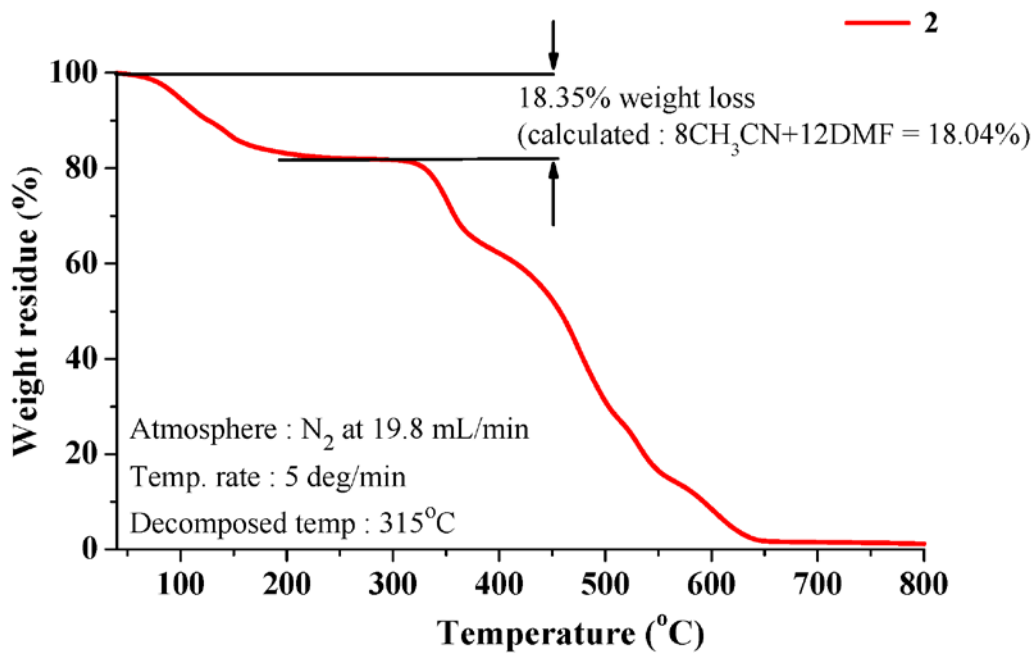

Figure S4

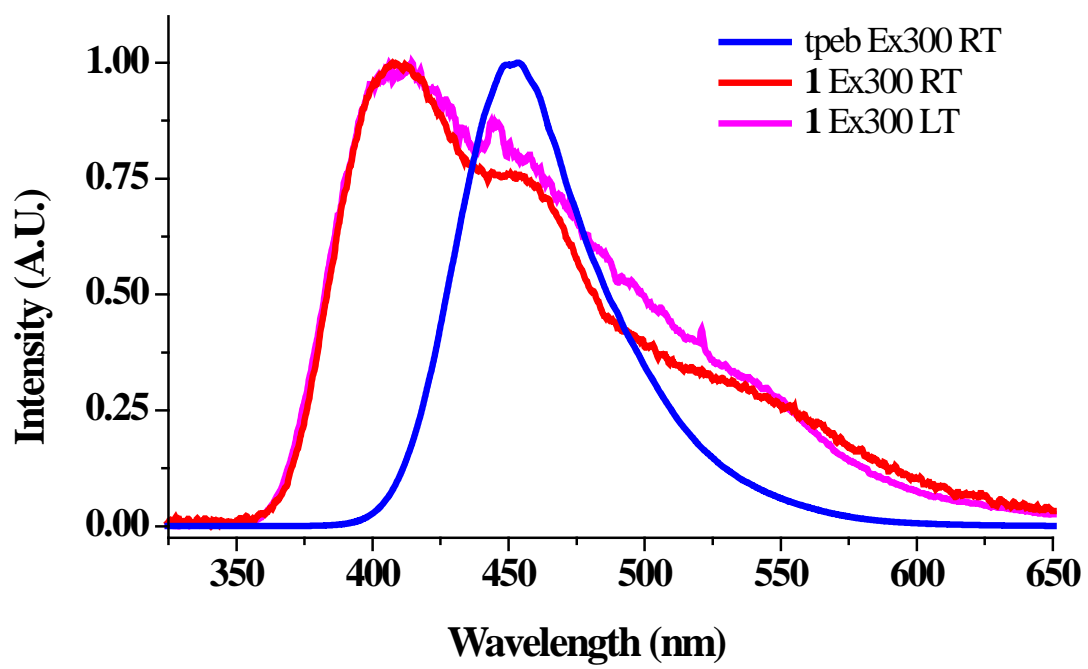

Figure S5



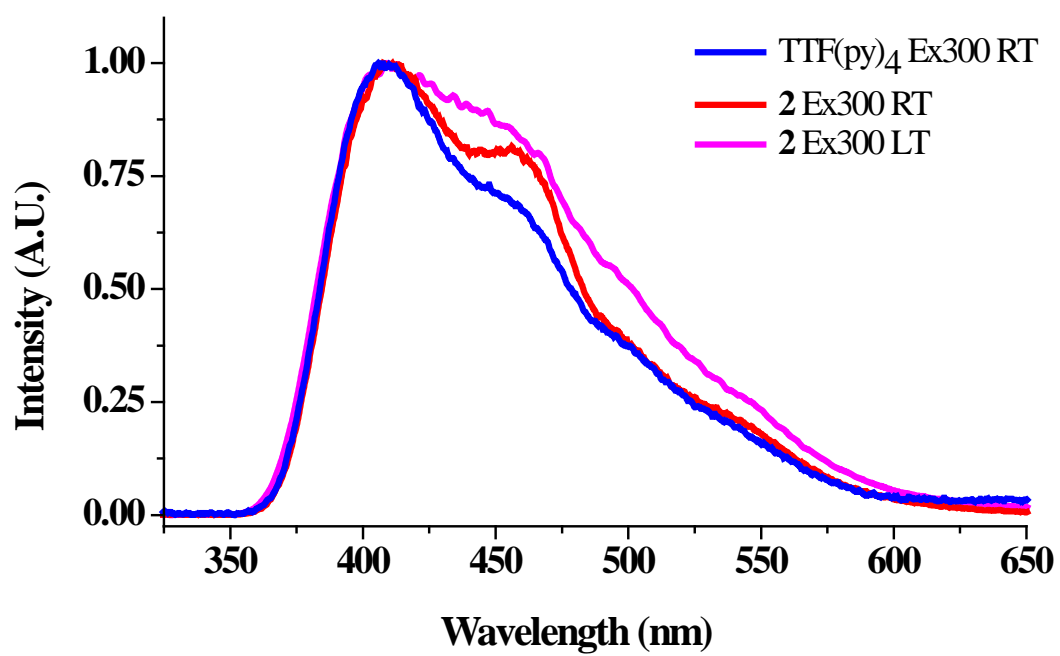

Figure S6
